# Supplementary material for: Toxicity and Control Efficacy of an Organosilicone to the Two-Spotted Spider Mite Tetranychus urticae and Its Crop Hosts
Source: MDPI journal article supplement (doi:10.3390/insects13040341), 2022-03-30
Supplement: s1 [file s1]

**Table S1.** Phytotoxicity index of strawberry, eggplant, kidney bean, and cucumber caused by the spray of Silwet 408.

| Con.<br>(mg/L) | Tem.<br>(°C) | Phytotoxicity Index |             |            |            |             |             |             |             |            |            |            |            |
|----------------|--------------|---------------------|-------------|------------|------------|-------------|-------------|-------------|-------------|------------|------------|------------|------------|
|                |              | Strawberry          |             |            | Eggplant   |             |             | Kidney Bean |             |            | Cucumber   |            |            |
|                |              | Day 1               | Day 3       | Day 7      | Day 1      | Day 3       | Day 7       | Day 1       | Day 3       | Day 7      | Day 1      | Day 3      | Day 7      |
| 4000           | 35           | 66.1 ± 8.5          | 39.7 ± 6.8  | 18.2 ± 6.0 | 64.3 ± 6.6 | 75.3 ± 7.1  | 72.7 ± 3.9  | 72.2 ± 9.4  | 92.6 ± 6.0  | 86.3 ± 2.6 | 67.9 ± 2.7 | 84.0 ± 4.0 | 82.9 ± 5.2 |
|                | 30           | 35.8 ± 4.6          | 24.2 ± 4.1  | 6.9 ± 0.6  | 72.6 ± 2.6 | 83.5 ± 4.1  | 77.8 ± 0.0  | 54.3 ± 9.6  | 64.2 ± 8.3  | 88.3 ± 2.2 | 74.8 ± 4.2 | 82.0 ± 2.1 | 82.6 ± 2.1 |
|                | 25           | 58.5 ± 10.9         | 33.7 ± 2.1  | 14.5 ± 3.5 | 69.5 ± 2.6 | 81.0 ± 5.8  | 71.2 ± 3.4  | 53.7 ± 12.1 | 64.8 ± 8.0  | 77.8 ± 0.0 | 69.1 ± 4.4 | 79.3 ± 3.7 | 78.8 ± 2.8 |
|                | 20           | 41.3 ± 5.3          | 31.3 ± 6.0  | 15.2 ± 2.9 | 71.1 ± 6.0 | 75.3 ± 6.2  | 70.5 ± 5.4  | 46.3 ± 7.6  | 64.8 ± 9.2  | 87.0 ± 4.0 | 69.1 ± 3.6 | 82.7 ± 2.0 | 83.3 ± 3.3 |
| 2000           | 35           | 19.7 ± 10.1         | 21.7 ± 11.6 | 8.0 ± 1.3  | 27.8 ± 2.6 | 36.9 ± 11.2 | 35.4 ± 10.3 | 21.6 ± 4.3  | 20.4 ± 3.3  | 38.0 ± 5.3 | 44.4 ± 8.7 | 30.9 ± 8.5 | 30.9 ± 8.5 |
|                | 30           | 18.7 ± 2.9          | 13.0 ± 4.0  | 4.8 ± 1.7  | 31.8 ± 4.1 | 37.1 ± 5.9  | 44.2 ± 1.4  | 22.5 ± 13.5 | 22.5 ± 13.5 | 46.3 ± 2.3 | 17.9 ± 1.8 | 16.7 ± 4.0 | 16.7 ± 4.0 |
|                | 25           | 11.6 ± 1.7          | 6.2 ± 1.0   | 2.9 ± 0.2  | 25.8 ± 3.9 | 40.7 ± 6.1  | 47.1 ± 3.5  | 19.4 ± 6.0  | 20.4 ± 3.8  | 41.7 ± 3.5 | 23.5 ± 2.8 | 33.2 ± 4.9 | 33.8 ± 4.3 |
|                | 20           | 33.1 ± 12.0         | 21.4 ± 8.9  | 10.4 ± 1.9 | 29.9 ± 8.5 | 30.2 ± 5.1  | 35.4 ± 3.7  | 7.4 ± 0.8   | 19.4 ± 1.3  | 38.0 ± 5.3 | 28.3 ± 6.9 | 37.5 ± 5.0 | 37.7 ± 4.8 |
| 1000           | 35           | 10.1 ± 7.3          | 5.0 ± 2.8   | 2.5 ± 1.8  | 17.6 ± 6.5 | 14.6 ± 5.5  | 21.1 ± 5.2  | 2.8 ± 1.3   | 4.6 ± 1.5   | 14.8 ± 3.0 | 3.1 ± 1.0  | 3.7 ± 0.9  | 3.7 ± 0.9  |
|                | 30           | 4.8 ± 1.8           | 4.4 ± 2.2   | 1.2 ± 0.5  | 14.2 ± 3.3 | 10.5 ± 1.0  | 15.1 ± 5.5  | 7.4 ± 1.5   | 5.6 ± 0.0   | 17.6 ± 2.0 | 1.2 ± 0.5  | 2.5 ± 1.3  | 3.1 ± 1.0  |
|                | 25           | 6.0 ± 0.4           | 3.0 ± 0.3   | 2.8 ± 0.4  | 17.7 ± 5.5 | 12.1 ± 2.3  | 22.0 ± 3.0  | 3.7 ± 1.5   | 3.7 ± 0.8   | 10.7 ± 3.3 | 3.1 ± 1.3  | 3.7 ± 1.7  | 4.3 ± 1.3  |
|                | 20           | 4.9 ± 1.3           | 1.3 ± 0.4   | 2.3 ± 1.2  | 12.1 ± 2.2 | 10.5 ± 4.4  | 15.0 ± 1.7  | 9.3 ± 4.0   | 19.4 ± 5.7  | 26.5 ± 4.1 | 0.6 ± 0.5  | 4.4 ± 0.9  | 3.2 ± 1.0  |

Con., concentration; Tem., temperature.

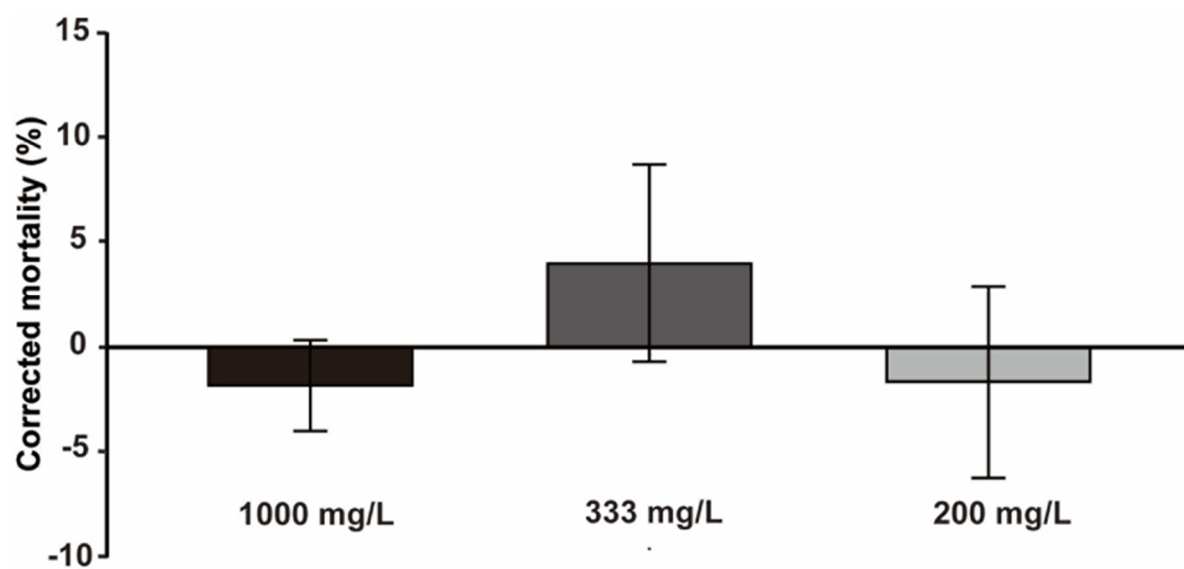

**Figure S1** Corrected mortality of *Tetranychus urticae* eggs treated with three concentrations of Silwet 408 aqueous solution. For the corrected mortality measure, see text.
